# Supplementary material for: Genomic attributes of airway commensal bacteria and mucosa
Source: Commun Biol. 2024 Feb 12;7:171. doi: 10.1038/s42003-024-05840-3 (PMC10861553; doi:10.1038/s42003-024-05840-3)
Supplement: Supplementary file 3 — Description of Additional Supplementary Files [file 42003_2024_5840_MOESM3_ESM.pdf]

## **Description of Additional Supplementary Files**

**File name:** Supplementary Data 1

**Description:** Bactopia report.

**File name:** Supplementary Data 2

**Description:** Genome quality report.

**File name:** Supplementary Data 3

**Description:** Kegg ontology matrix.

**File name:** Supplementary Data 4

**Description:** Kegg ontology annotations.

**File name:** Supplementary Data 5

**Description:** Community coverage by isolates.

**File name:** Supplementary Data 6

**Description:** Mucosal genomics.

**File name:** Supplementary Data 7

**Description:** Mucosal metabolomics.
